# Supplementary figures and images for: Evaluation of Phenolic Compounds and Pigments Content in Yellow Bell Pepper Wastes
Source: MDPI journal article supplement (doi:10.3390/antiox11030557), 2022-03-15

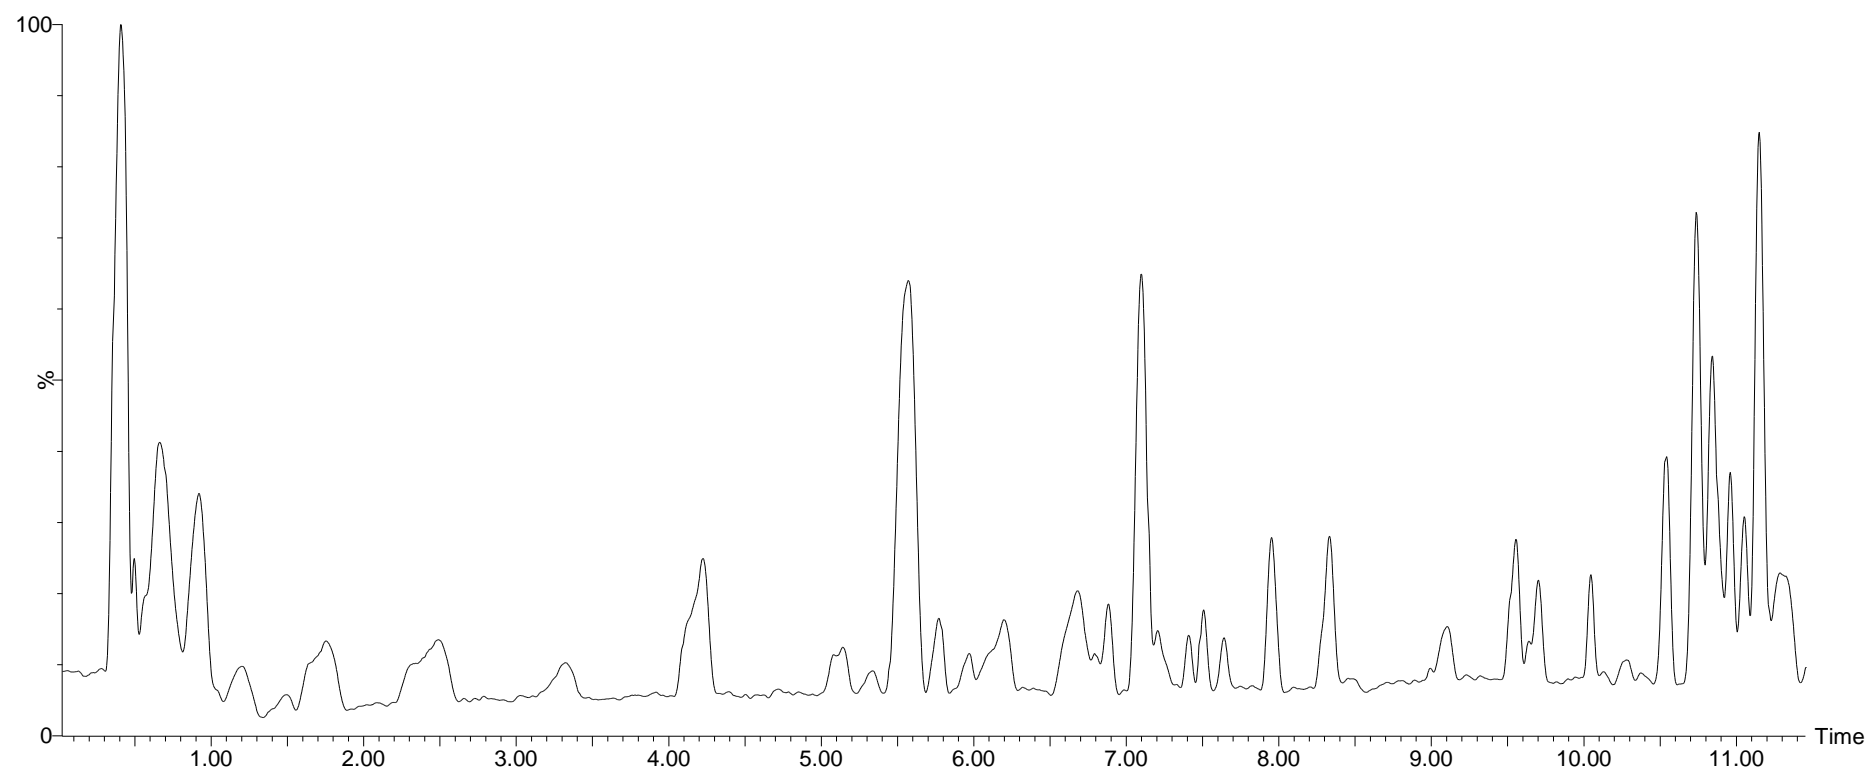

**Figure S1.** Indicative base peak total ion chromatogram of the pepper samples analysed by HPLC-MS.

Supplement: s1 [file s1]
